# Supplementary material for: Hypertension awareness, treatment and control among ethnic minority populations in Europe: a systematic review and meta-analysis
Source: PubMed Central journal article supplement — J Hypertens. 2020 Sep 9;39(2):202–13. doi: 10.1097/HJH.0000000000002651 (PMC7810417; doi:10.1097/hjh.0000000000002651), 2020-09-09
Supplement: jhype-39-202-s001.pdf [file jhype-39-202-s001.pdf]

## Supplementary Digital Content to 'Hypertension awareness, treatment and control among minority ethnic populations in Europe: a systematic review and meta-analysis'

### Supplementary Digital Content 1 – Search strategy in Medline

- # Searches
- 1 hypertension/ or exp blood pressure/
- 2 (high blood pressure or hypertens\* or blood pressure or "140/90mm" or "140/90" or "140 and 90 mm" or "140 mm hg" or "90 mm hg" or calcium antagonist? or calcium-channel or angiotensin or ace or beta blocker? or adrenergic or diuretic?).ab,kf,ti.
- 3 or/1-2 [hypertension]
- 4 exp europe/
- 5 (Europe\* or Bulgaria? or Czech\* or Hungar\* or Poland or Moldova? or Romania? or Russia? or Slovakia? or Ukrain\* or Denmark or Estonia? or Faroe or Finland or Iceland\* or Ireland or "Isle of Man" or Latvia? or Lithuania? or Norway or Sweden or england or United Kingdom or Britain or Albania or Andorra or "Bosnia and Herzegovina" or Croatia or Gibraltar or Greece or Holy See or Italy or Malta or Montenegro or Portugal or San Marino or Serbia or Slovenia or Spain or Yugoslav or Macedonia or Austria or Belgium or France or Germany or Liechtenstein or Luxembourg or Monaco or Netherlands or Switzerland or English or Scottish or Irish or Dutch or british or Danish or Swedish or Finnish or Norwegian or Belgium or German or French or Spanish or Portuguese or Italian or Swiss or Austrian or Slovakian or Polish or Hungarian or Croatian or Bosnian or Serbian or Bulgarian or Albanian or Greek or Macedonian or Romanian or Ukraine or Moldavian or Belarussian or Russian or Estonian or Latvian or Lithuanian or Oslo or Bergen or Stockholm or Gothenburg or Malmo or Copenhagen or Helsinki or London or Manchester or Leeds or Liverpool or Edinburgh or Glasgow or Dublin or Berlin or Hamburg or Bremen or Cologne or Munich or Stuttgart or Frankfurt or Amsterdam or Rotterdam or The Hague or Brussel or Antwerp or Luxemburg or Paris or Nantes or Lyon or Marseille or Toulouse or Madrid or Malaga or Sevilla or Valencia or Porto or Lisbon or Roma or Napoli or Milano or Zurich or Athens or Tirana or Sarajevo or Sofia or Zagreb or Belgrade or Budapest or Bratislava or Wien or Warszawa or Minsk or Tallinn or Riga or Vilnius or Kiev or Moscow or eu citizen?).ab,jw,kf,ti.
- 6 or/4-5 [in Europe setting]
- 7 african continental ancestry group/ or ethnology/ or ethnic groups/ or arabs/ or inuits/ or "emigration and immigration"/ or exp "emigrants and immigrants"/
- 8 ethnology.fs.
- 9 (Ethnic or ethnicity or Ethnology or Race or Racial or Migrant? or Immigrant? or Immigration or Refugee? or Nationality or (minority adj2 group?) or ((Africa or Northern Africa or Sub-Saharan or Eastern Africa or Middle Africa or Southern Africa or Western Africa or America? or Caribbean or Asia or Oceania or Australia or New Zealand or Melanesia or Micronesia or Polynesia or African? or Algerian or Egyptian or Libyan or Moroccan or Sudanese or Tunisian or Western Saharan or Arab or Afro-Arab or Arabic or Black? or Beninese or Burkinabe or Cabo Verdeans or Ivorian or Gambian or Ghanaian or Guinean or Guinea-Bissauan or Liberian or Malian or Mauritanian or Nigerian or Nigerian or Senegalese or Sierra Leonean or Togolese or Burundian or Eritrean or Ethiopian or Kenyan or Malawian or Mozambican or Rwandan or Somalian or Sudanese or Ugandan or Tanzanian or Zambian or Zimbabwean or Angolan or Cameroonian or Chads or Congeal or Guinean or Gabonese or Botswanian or Mesotho or Namibian or American or Canadian or Caribbean or Jamaican or Haitian or Cuban or Mexican or Costa Rican or Guatemalan or Honduran or Argentinean or Bolivian or Brazilian or Chilean or Colombian or Ecuadorian or Guyanese or Paraguayan or Peruvian or Surinamese or Uruguayan or Venezuelans or Asian or Kazakh or Kyrgyzstanis or Tajikistanis or Turkmens or Uzbekistanis or chinese or South-Korean or North-Korean or Japanese or Mongolian or Bruneian or Cambodian or Indonesian or Laotian or Malaysian or Myanmarese or Burmese or Philipppian or Singaporean or Thai or Timorese or Vietnamese or Afghan or Bangladeshis or Bhutanese or Indian or Iranian or Nepalese or Pakistani or Sri Lankan or Armenian or Azerbaijani or Bahraini or Cypriot or Georgian or Iraqi or Israeli or Jordanian or Kuwaiti or Lebanese or Omanis or Qataris or Saudi Arabian or Palestinian or Syrian or Turk\* or Emirati or Yemeni or hispanic?) adj2 (group? or minority or speaking or culture))).ab,kf,ti.
- 10 or/7-9 [minority ethnic groups]
- 11 and/3,6,10
- 12 (Maternal mortality or Gestational age or Apgar score or Birth or Gestational weight gain or Macrosomia or Maternal characteristics or Perinatal death or pregnancy or Maternal weight or Obstetric history or Gestational diabetes or parous woman or Fetus or cesarean section or abortion or neonatal death or fetal or baby or weeks gestation or adverse perinatal outcome or placenta or nulliparous woman or preterm or antenatal care or first trimester or macrosomia or Maternal health

- or Maternal death or Labo?r or pre-eclampsia or Contraception or pregnant or GDM or SMA or lga or IBW).ab,kf,ti. [VOS light blue]
- 13 (Trauma or surgeon or intensive care unit or surgical procedure or resuscitation or intravenous fluid or hematoma or hospital mortality or stay or blood transfusion or fracture or hospital stay or ranking scale score or pediatric patient or mechanical ventilation or seizure or recovery or chemotherapy or antibiotic or intracranial pressure or oxygenation or propofol or blood gase or remifentanil or induction or oxygen or catheter or carbodioxide or brain injury or ventilation or intubation or laparotomy or analgesia or general anesthesia or anaesthesia or extubation or sedation or hypothermia or dog or cocaine or lactate or cardiac surgery or acidosis or fentanyl or bolus).ab,kf,ti. [VOS dark blue]
- 14 (animal? or compound? or plant? or substance? or estrogen or traditional medicine or asset or herb? or mixture or leukocyte or pig? or cat? or "in vivo" or rabbit? or hamster or bacterium or infarct size or sham or chinese hamster ovary or chinese hamster overay cell or rat or rats or gene expression or shr or ici or mouse or fluorescence or saline or density or protein or growth factor or colon).ab,kf,ti. [VOS yellow]
- 15 (Mum or Runner).ab,kf,ti. [VOS orange]
- 16 (transmission or wild type).ab,kf,ti. [VOS pink]
- 17 brazilian state capital.ab,kf,ti. [VOS red]
- 18 or/12-17
- 19 11 not 18
- 20 aware\*.ab,kf,sh,ti. [awareness]
- 21 (treat\* or drug? or medication).ab,kf,ti.
- 22 (drug therapy or drug effects or "therapeutic use" or prevention control or therapy or administration dosage).fs.
- 23 21 or 22 [treatment]
- 24 (control\* or monitoring).ab,kf,ti. [control]
- 25 or/20,23-24 [awareness treatment control]
- 26 19 and 25
- 27 animals/ not humans/
- 28 26 not 27
- 29 (((heliu or rodam or chip or sunset or ghaia) adj2 (study or trial)) or "healthy life in an urban setting" or "Research on Obesity and Type 2 Diabetes among African Migrants" or "chinese in prato" or "Surinamese in The Netherlands: Study on Ethnicity and Health" or "ghanaians in amsterdam aimhy programme" or aimhy inform or "Ancestry Informative Markers in Hypertension" or NCT02847338).ab,kf,ti.
- 30 28 or 29
- 31 remove duplicates from 30

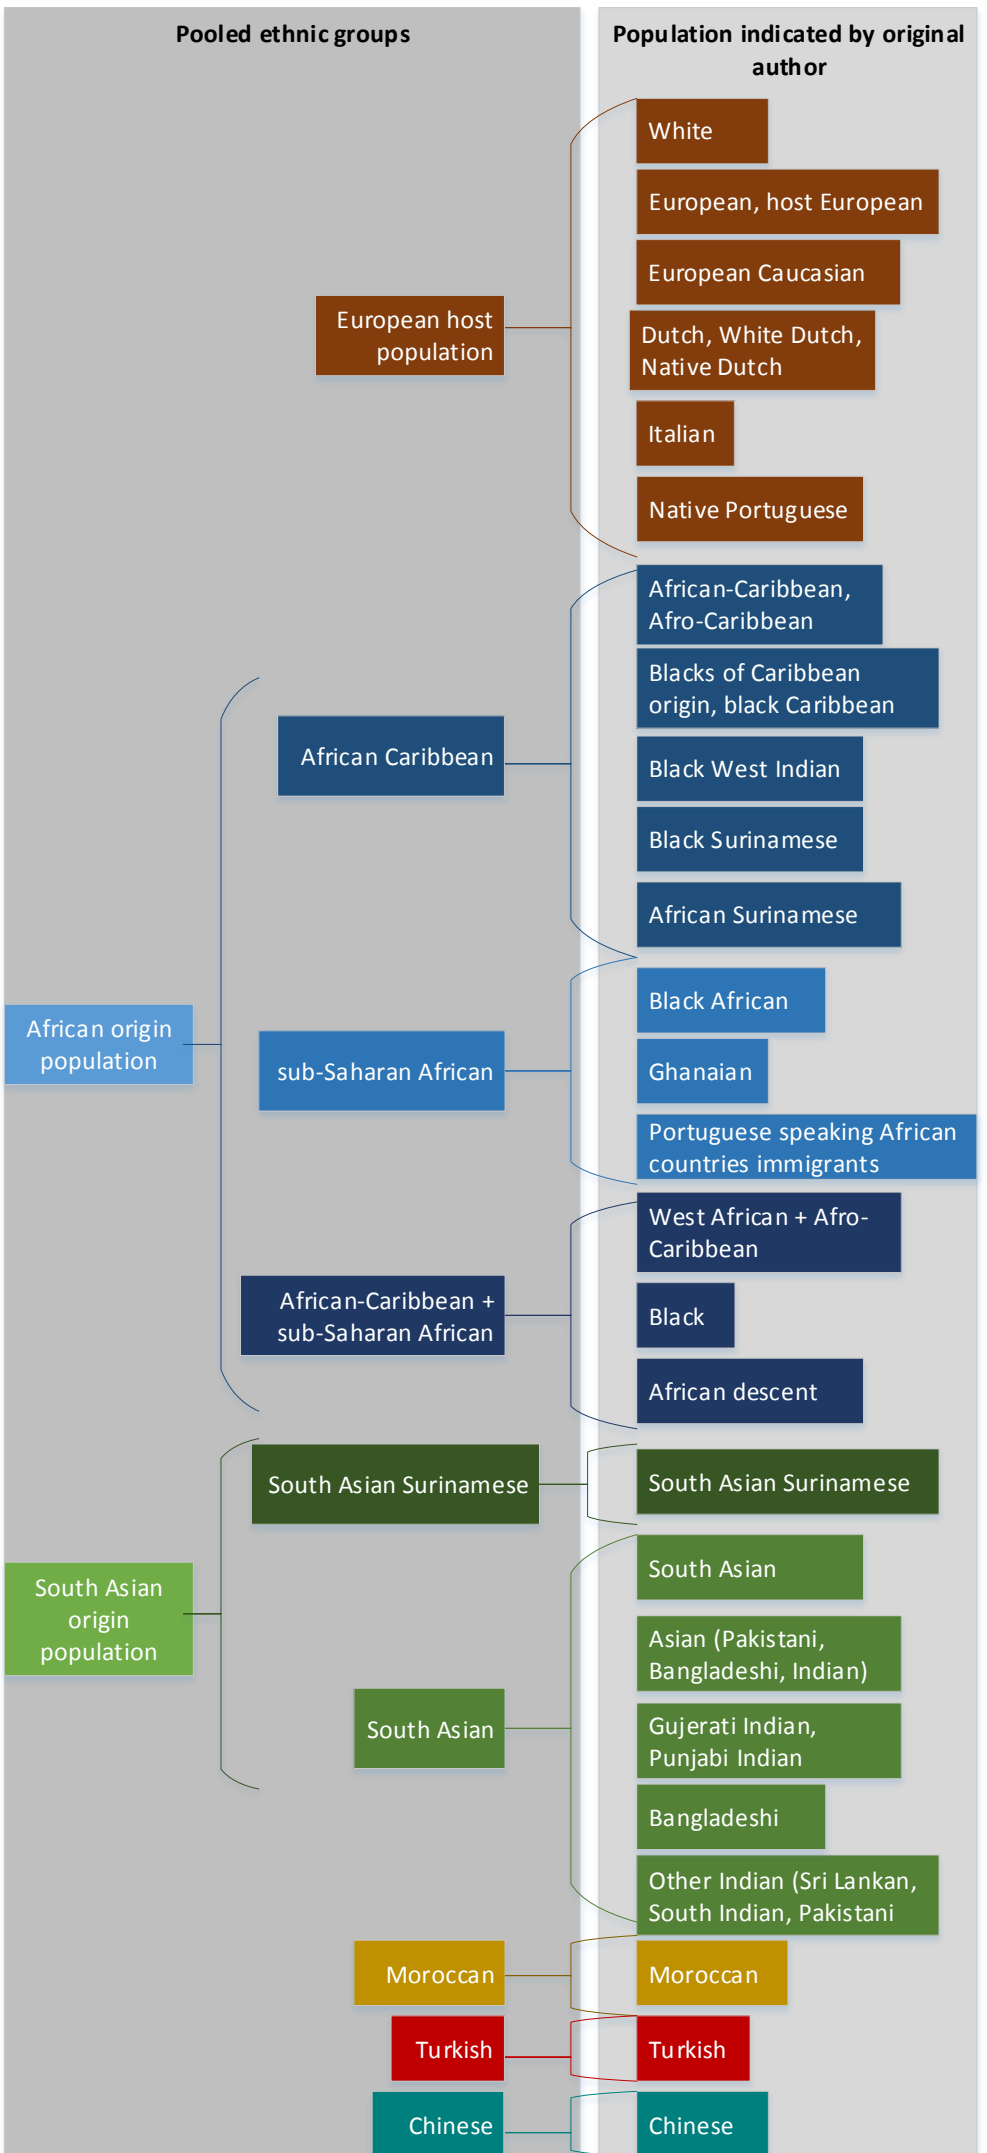

Supplementary Digital Content 3 - Flowchart of study identification and selection

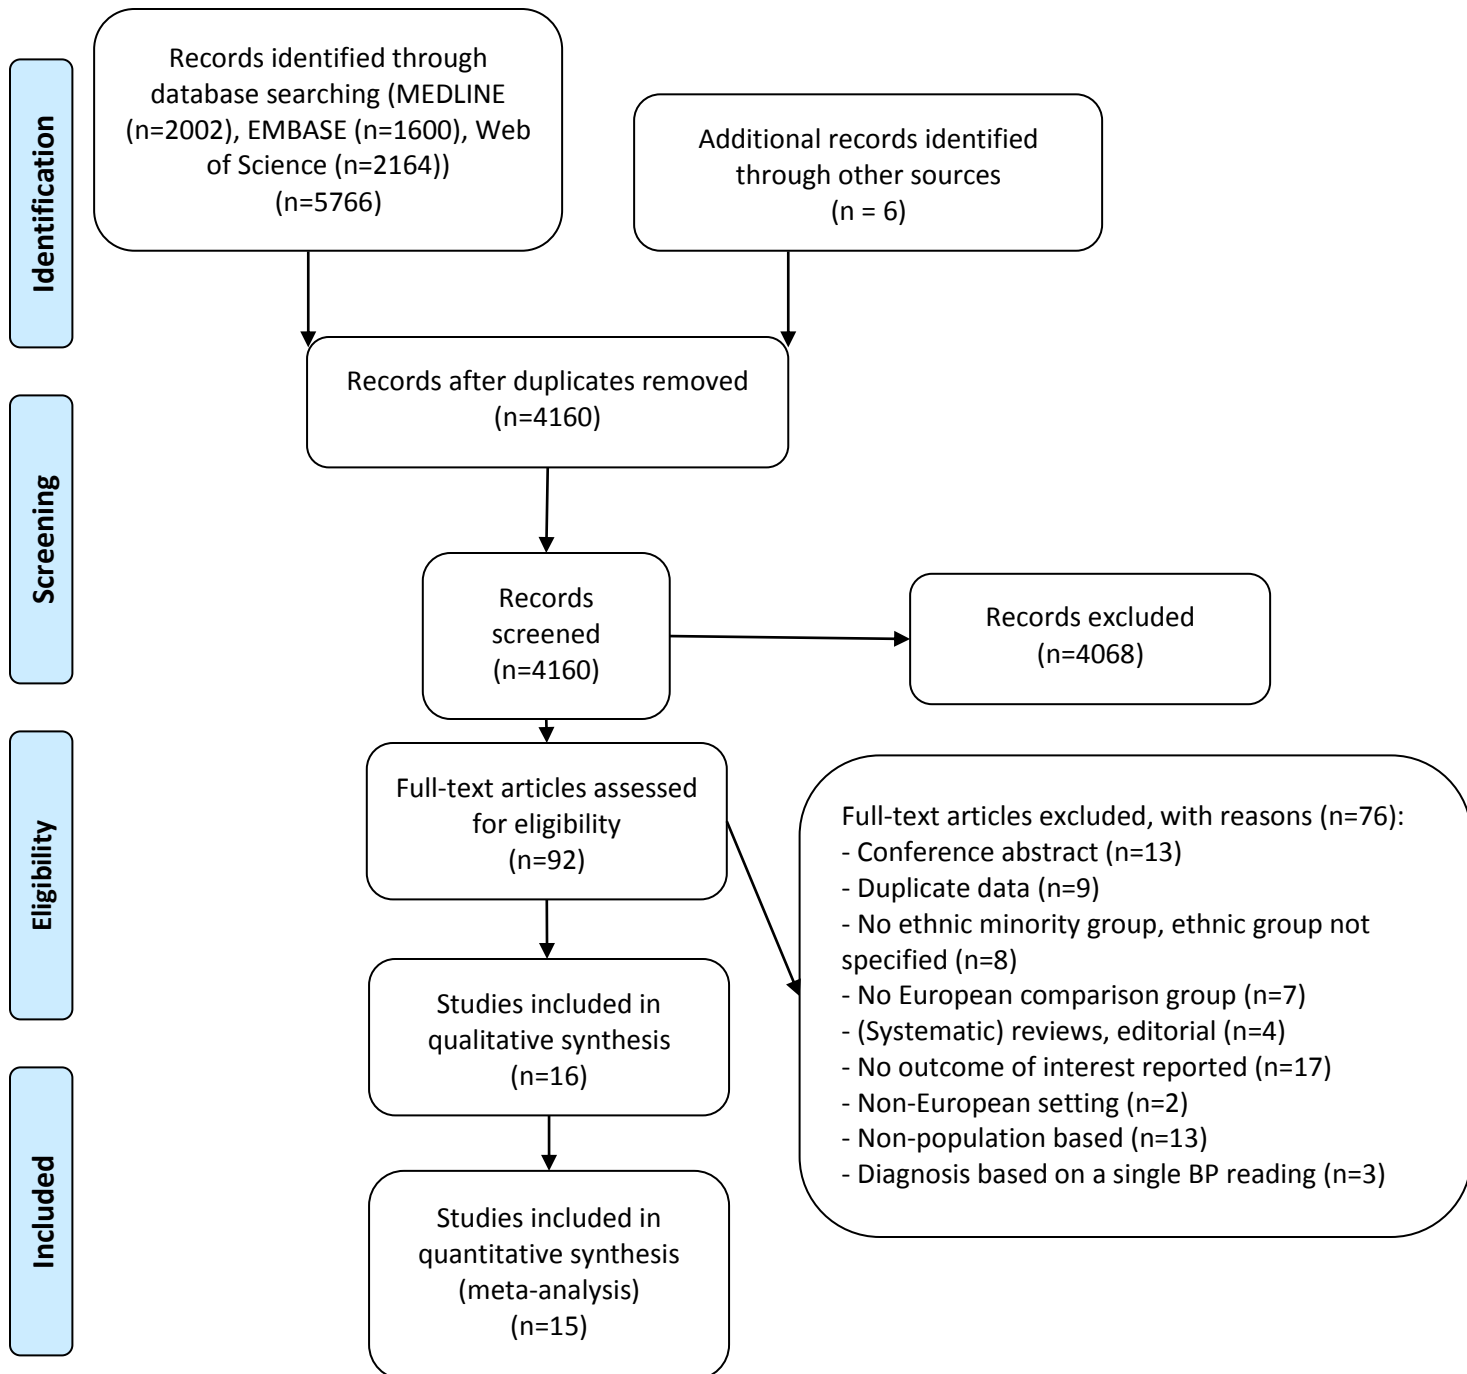

**Supplementary Digital Content 4** – Study results of included studies using blood pressure cut-offs of systolic  $\geq 160$  and/or diastolic  $\geq 95$  mmHg to define hypertension

| Hypertension                 |                                                                                                |                                                                                                      |                              |            |                  |                              |                              |                            |                  |     |
|------------------------------|------------------------------------------------------------------------------------------------|------------------------------------------------------------------------------------------------------|------------------------------|------------|------------------|------------------------------|------------------------------|----------------------------|------------------|-----|
| Author, year                 | Diagnostic method                                                                              | Definition                                                                                           | Population                   | Total n    | Prevalence n (%) | Awareness <sup>q</sup> n (%) | Treatment <sup>~</sup> n (%) | Control <sup>^</sup> n (%) | Control & (n, %) |     |
| <b>Cappuccio, 1997 (15)</b>  | Automatic ultrasound sphygmomanometer; three BP reading at left arm, mean of last two readings | SBP $\geq 160$ and/or DBP $\geq 95$ or being on antihypertensive medication                          | <b>Men+women</b>             |            |                  |                              |                              |                            |                  |     |
|                              |                                                                                                |                                                                                                      | White:                       | 524        | 79 (15.1)        | 62 (78.5)                    | 48 (60.8)                    | 40 (83.4)                  | 40 (50.7)        |     |
|                              |                                                                                                |                                                                                                      | SSA+African Caribbean:       | 549        | 229 (41.7)       | 202 (88.2)                   | 171 (74.7)                   | 113 (66.2)                 | 113 (49.4)       |     |
|                              |                                                                                                |                                                                                                      | SA:                          | 505        | 134 (26.5)       | 98 (73.1)                    | 81 (60.4)                    | 63 (77.8)                  | 63 (47.0)        |     |
| <b>Chaturvedi, 1993 (16)</b> | Ambulatory blood pressure monitor; mean of first two resting office BP readings                | SBP $\geq 160$ and/or DBP $\geq 95$ or being on antihypertensive medication                          | <b>Men</b>                   |            |                  |                              | n/a                          |                            | n/a              | n/a |
|                              |                                                                                                |                                                                                                      | European:                    | 272        | 38 (14.0)        |                              | 20 (52.6)                    |                            |                  |     |
|                              |                                                                                                |                                                                                                      | West African+Afro-Caribbean: | 247        | 78 (31.6)        |                              | 52 (66.7)                    |                            |                  |     |
|                              |                                                                                                |                                                                                                      | <b>Women</b>                 |            |                  |                              |                              |                            |                  |     |
| European:                    | 313                                                                                            | 41 (13.1)                                                                                            |                              | 31 (75.6)  |                  |                              |                              |                            |                  |     |
| West African+Afro-Caribbean: | 334                                                                                            | 125 (37.4)                                                                                           |                              | 101 (80.8) |                  |                              |                              |                            |                  |     |
| <b>Cruickshank 1983 (18)</b> | Random zero sphygmomanometer; first of two BP readings at rights arm                           | SBP $\geq 160$ or DBP $\geq 95$ or being on antihypertensive treatment (treatment not specified)     | <b>Men</b>                   |            |                  |                              | n/a                          |                            | n/a              | n/a |
|                              |                                                                                                |                                                                                                      | White:                       | 439        | 97 (22.1)        |                              | 6 (6.2)                      |                            |                  |     |
|                              |                                                                                                |                                                                                                      | Black West Indian:           | 173        | 45 (26.0)        |                              | 2 (4.7)                      |                            |                  |     |
|                              |                                                                                                |                                                                                                      | Asian:                       | 172        | 29 (16.9)        |                              | 2 (7.4)                      |                            |                  |     |
|                              |                                                                                                |                                                                                                      | <b>Women</b>                 |            |                  |                              |                              |                            |                  |     |
|                              |                                                                                                |                                                                                                      | White:                       | 164        | 26 (15.9)        |                              | 1 (4.0)                      |                            |                  |     |
| Black West Indian:           | 101                                                                                            | 28 (27.7)                                                                                            |                              | 7 (33.3)   |                  |                              |                              |                            |                  |     |
| <b>Cruickshank 1991 (17)</b> | Random zero sphygmomanometer; mean of two BP readings                                          | SBP $\geq 160$ and/or DBP $\geq 95$ or being on antihypertensive treatment (treatment not specified) | <b>Men</b>                   |            |                  |                              | n/a                          |                            | n/a              | n/a |
|                              |                                                                                                |                                                                                                      | White:                       | 49         | 10 (20.4)        |                              | 3 (30.0)                     |                            |                  |     |
|                              |                                                                                                |                                                                                                      | Afro-Caribbean:              | 53         | 18 (34.0)        |                              | 11 (61.1)                    |                            |                  |     |
|                              |                                                                                                |                                                                                                      | Indian:                      | 47         | 15 (31.9)        |                              | 6 (40.0)                     |                            |                  |     |
|                              |                                                                                                |                                                                                                      | <b>Women</b>                 |            |                  |                              |                              |                            |                  |     |
|                              |                                                                                                |                                                                                                      | White:                       | 52         | 18 (34.6)        |                              | 14 (77.8)                    |                            |                  |     |
| Afro-Caribbean:              | 53                                                                                             | 24 (45.3)                                                                                            |                              | 13 (54.2)  |                  |                              |                              |                            |                  |     |
| Indian:                      | 60                                                                                             | 8 (13.3)                                                                                             |                              | 4 (50.0)   |                  |                              |                              |                            |                  |     |
| <b>Cruickshank 2001 (19)</b> | Standard mercury sphygmomanometer; three BP readings, mean of last two readings                | SBP $\geq 160$ and/or DBP $\geq 95$ or being on antihypertensive medication; HT control $< 140/90$   | <b>Men</b>                   |            |                  |                              | n/a                          |                            | n/a              | n/a |
|                              |                                                                                                |                                                                                                      | European:                    | 265        | 69 (26.0)        |                              | 32 (46.4)                    | 14 (43.8)                  | 14 (20.3)        |     |
|                              |                                                                                                |                                                                                                      | African-Caribbean:           | 222        | 80 (36.0)        |                              | 51 (63.8)                    | 11 (21.6)                  | 11 (13.8)        |     |
|                              |                                                                                                |                                                                                                      | <b>Women</b>                 |            |                  |                              |                              |                            |                  |     |
|                              |                                                                                                |                                                                                                      | European:                    | 293        | 51 (17.4)        |                              | 24 (80.4)                    | 3 (12.5)                   | 6 (11.8)         |     |
|                              |                                                                                                |                                                                                                      | African-Caribbean:           | 258        | 91 (35.3)        |                              | 65 (71.4)                    | 19 (29.2)                  | 19 (20.9)        |     |
| <b>Haines, 1987 (20)</b>     | Random zero sphygmomanometer; mean of two BP readings                                          | SBP $\geq 160$ and/or DBP $\geq 95$ or being on antihypertensive treatment (treatment not specified) | <b>Men</b>                   |            |                  |                              | n/a                          |                            | n/a              | n/a |
|                              |                                                                                                |                                                                                                      | Black-Caribbean:             | 191        | 31 (16.2)        |                              | 17 (54.8)                    |                            |                  |     |
|                              |                                                                                                |                                                                                                      | White:                       | 450        | 44 (9.8)         |                              | 23 (52.3)                    |                            |                  |     |
|                              |                                                                                                |                                                                                                      | <b>Women</b>                 |            |                  |                              |                              |                            |                  |     |
|                              |                                                                                                |                                                                                                      | Black-Caribbean:             | 224        | 19 (8.5)         |                              | 16 (84.2)                    |                            |                  |     |
|                              |                                                                                                |                                                                                                      | White:                       | 486        | 44 (9.1)         |                              | 27 (61.4)                    |                            |                  |     |
| <b>Knight, 1993 (21)</b>     | Electronic sphygmomanometer; multiple readings                                                 | SBP $\geq 160$ or DBP $\geq 95$ or being on antihypertensive treatment (treatment not specified)     | <b>Men</b>                   |            |                  |                              | n/a                          |                            | n/a              | n/a |
|                              |                                                                                                |                                                                                                      | Asian:                       | 128        | 34 (26.6)        |                              | 6 (17.6)                     |                            |                  |     |
|                              |                                                                                                |                                                                                                      | Non-Asian:                   | 160        | 37 (23.1)        |                              | 4 (10.8)                     |                            |                  |     |
| <b>Primatesta, 2000 (24)</b> | Automated device; three BP readings, mean of last two readings on right arm                    | SBP $\geq 160$ or DBP $\geq 95$ or being on antihypertensive medication; HT control BP $< 160/95$    | <b>Men</b>                   |            |                  |                              | n/a                          |                            | n/a              | n/a |
|                              |                                                                                                |                                                                                                      | White:                       | 14629      | 5266 (36)        |                              | 2896 (55)                    | 1853 (64)                  | 1853 (35.2)      |     |
|                              |                                                                                                |                                                                                                      | SSA+African Caribbean:       | 136        | 72 (53)          |                              | 46 (64)                      | 26 (57)                    | 26 (36.1)        |     |
|                              |                                                                                                |                                                                                                      | SA:                          | 286        | 146 (51)         |                              | 73 (50)                      | 50 (69)                    | 50 (34.2)        |     |
|                              |                                                                                                |                                                                                                      | <b>Women</b>                 |            |                  |                              |                              |                            |                  |     |
|                              |                                                                                                |                                                                                                      | White:                       | 16 990     | 5947 (35)        |                              | 3568 (60)                    | 2248 (63)                  | 2248 (37.8)      |     |
|                              |                                                                                                |                                                                                                      | SSA+African Caribbean:       | 159        | 89 (56)          |                              | 67 (75)                      | 45 (67)                    | 45 (50.6)        |     |
| SA:                          | 243                                                                                            | 80 (33)                                                                                              |                              | 52 (65)    | 23 (45)          | 23 (28.8)                    |                              |                            |                  |     |

<sup>q</sup> In percentage of participants with hypertension; <sup>~</sup> In percentage of participants with hypertension; <sup>^</sup> In percentage of those on treatment for hypertension; & In percentage of participants with hypertension

**Supplementary Digital Content 5** - Comparison of prevalence of hypertension treatment and control among those on treatment between African origin and European host populations of studies using blood pressure cut-offs of systolic  $\geq 160$  and/or diastolic  $\geq 95$  mm Hg to define hypertension

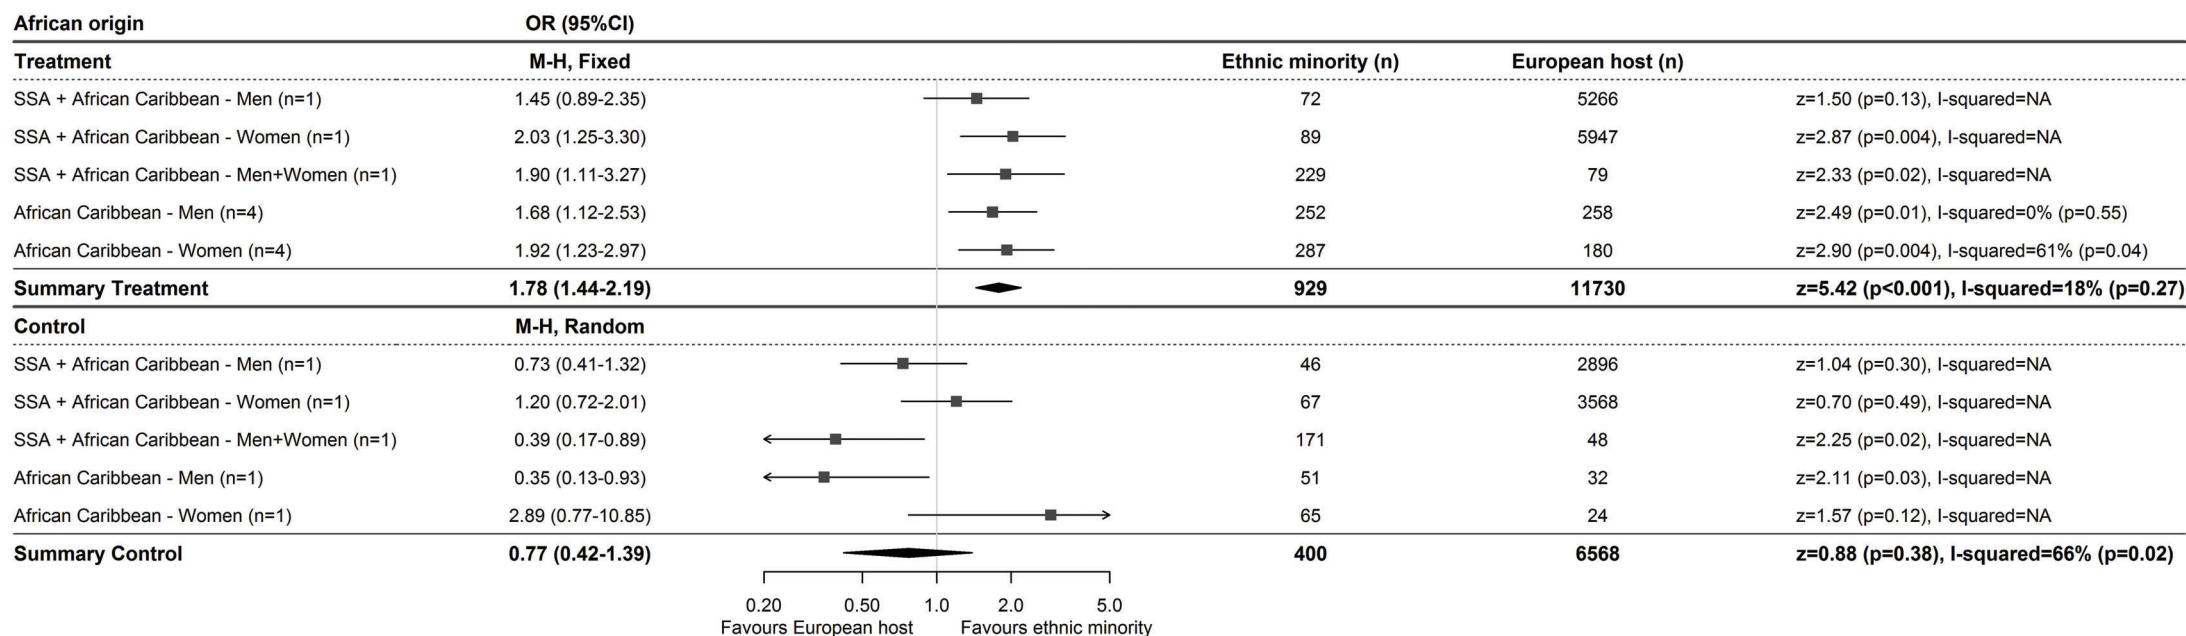

Diamonds denote the weighted pooled odds ratios with 95% confidence intervals. M-H, Mantel-Haenszel; SSA; Sub-Saharan African; OR, odds ratio; CI, confidence interval, "n" is the number of comparisons available for each subgroup

**Supplementary Digital Content 6** - Comparison of prevalence of hypertension treatment and control among those on treatment between South Asian origin and European host populations of studies using blood pressure cut-offs of systolic  $\geq 160$  and/or diastolic  $\geq 95$  mm Hg to define hypertension

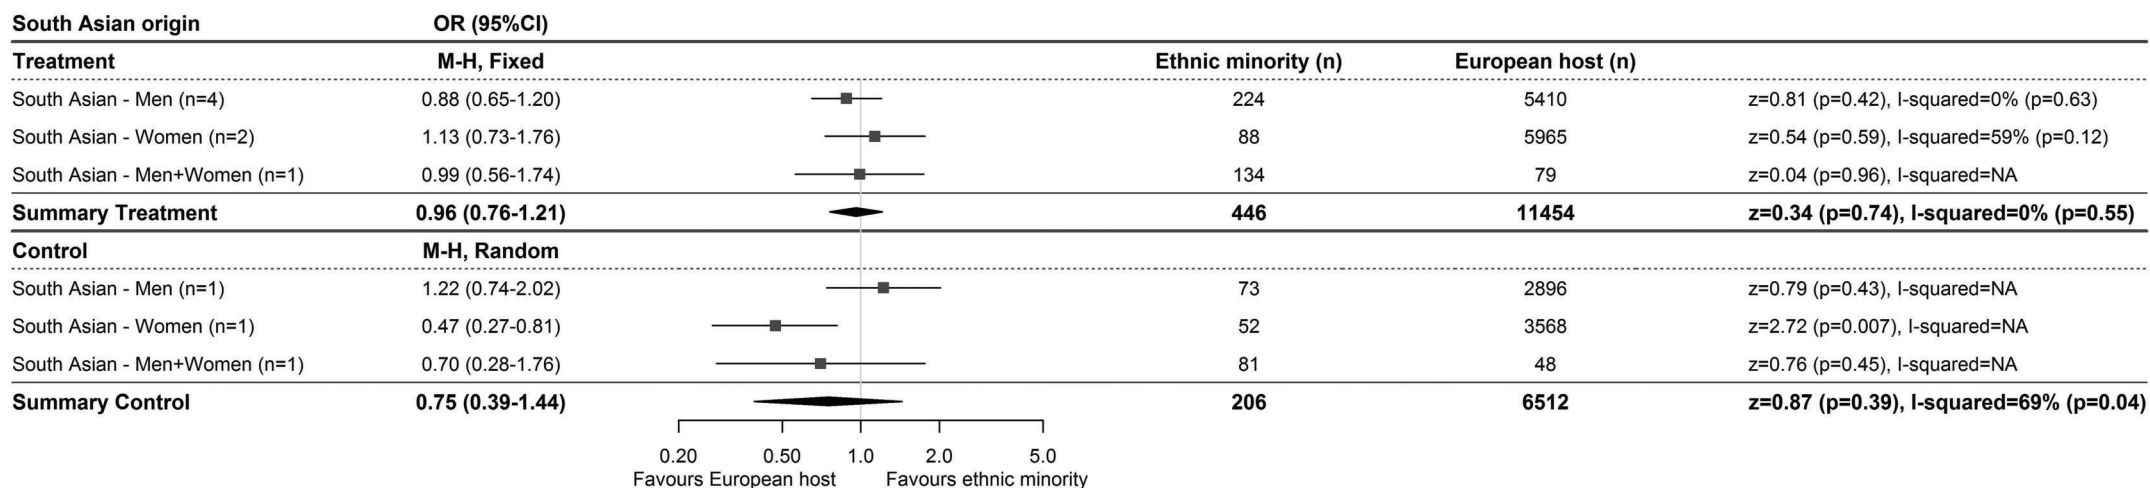

Diamonds denote the weighted pooled odds ratios with 95% confidence intervals. M-H, Mantel-Haenszel; OR, odds ratio; CI, confidence interval, "n" is the number of comparisons available for each subgroup

## Supplementary Digital Content 7 - Summary table of risk of bias assessment

|                          |                                                                      | Ayemang, 2005 | Ayemang, 2006 | Ayemang, 2015 | Cappuccio, 1997 | Chatuverdi, 1993 | Cruickshank, 1983 | Cruickshank, 1991 | Cruickshank, 2001 | Haines, 1987 | Knight, 1993 | Lemic-Stojcevic, 2001 | Lopes, 2016 | Modesti, 2017 | Nazroo, 2009 | Patel, 2007 | Primatesta, 2000 |
|--------------------------|----------------------------------------------------------------------|---------------|---------------|---------------|-----------------|------------------|-------------------|-------------------|-------------------|--------------|--------------|-----------------------|-------------|---------------|--------------|-------------|------------------|
| <b>External validity</b> |                                                                      |               |               |               |                 |                  |                   |                   |                   |              |              |                       |             |               |              |             |                  |
|                          | Study target population, close representation of national population | Orange        |               | Orange        | Orange          |                  |                   | Orange            | Orange            | Orange       | Orange       | Orange                | Orange      | Orange        | Green        | Orange      | Green            |
|                          | Sampling frame, close representation of target population            | Green         | Green         | Green         | Orange          | Orange           | Orange            | Orange            | Orange            | Orange       | Orange       | Orange                | Orange      | Green         | Green        | Orange      | Green            |
|                          | Random selection to select the sample                                | Green         |               |               |                 | Green            | Green             | Green             | Green             | Green        | Green        | Green                 | Green       | Green         | Green        | Orange      | Green            |
|                          | Non-response bias                                                    | Orange        | Orange        | Green         | Green           | Orange           |                   | Green             | Orange            | Orange       | Green        | Orange                | Orange      | Orange        | Orange       | Orange      | Green            |
| <b>Internal validity</b> |                                                                      |               |               |               |                 |                  |                   |                   |                   |              |              |                       |             |               |              |             |                  |
|                          | Data collected directly from subject                                 | Green         | Green         | Green         | Green           | Green            | Green             | Green             | Green             | Green        | Green        | Green                 | Green       | Green         | Green        | Green       | Green            |
|                          | Acceptable case definition                                           | Green         | Green         | Green         | Green           | Green            | Orange            | Green             | Green             | Green        | Green        | Green                 | Green       | Green         | Green        | Orange      | Green            |
|                          | Study instrument reliable and valid                                  | Green         | Green         | Green         | Green           | Orange           | Orange            | Orange            | Orange            | Orange       | Orange       | Orange                | Orange      | Green         | Orange       | Green       | Orange           |
|                          | Same mode of data collection used for all subjects                   | Green         | Green         | Orange        | Green           | Green            | Green             | Green             | Green             | Green        | Green        | Green                 | Green       | Green         | Green        | Green       | Green            |
|                          | Length of shortest prevalence period                                 | Green         | Green         | Green         | Green           | Green            | Green             | Green             | Green             | Green        | Green        | Green                 | Green       | Green         | Green        | Green       | Green            |
|                          | Numerator and denominator                                            | Green         | Green         | Green         | Green           | Green            | Green             | Green             | Green             | Green        | Green        | Green                 | Green       | Green         | Green        | Green       | Green            |
| <b>Summary</b>           |                                                                      | Green         | Orange        | Green         | Green           | Orange           | Orange            | Orange            | Orange            | Orange       | Orange       | Orange                | Orange      | Green         | Green        | Green       | Orange           |

Based on Risk of Bias Tool developed by Hoy et al. Green color indicates low risk of bias, orange color indicates moderate risk of bias
